# Supplementary material for: Seasonal and inter-annual variability of plankton chlorophyll and primary production in the Mediterranean Sea: a modelling approach
Source: Copernicus journal article supplement (doi:10.5194/bg-9-217-2012), 2012-01-11
Supplement: Supplementary file 1 [file bg-9-217-2012-supplement.zip]

Archive with 2 entries (2 files):
- bg-2011-161-suppl_2.pdf
- bg-2011-161-suppl_1.pdf
