# Supplementary material for: Seasonal and inter-annual variability of plankton chlorophyll and primary production in the Mediterranean Sea: a modelling approach
Source: Copernicus journal article supplement (doi:10.5194/bg-9-217-2012), 2012-01-11
Supplement: Supplementary file 1 [file bg-9-217-2012-supplement.zip › bg-2011-161-suppl_2.pdf]

# Supplementary material (part 2) of “Seasonal and inter-annual variability of plankton chlorophyll and primary production in the Mediterranean Sea: a modelling approach”

by P. Lazzari<sup>1</sup>, C. Solidoro<sup>1</sup>, V. Ibelli<sup>1,\*</sup>, S. Salon<sup>1</sup>, A. Teruzzi<sup>1</sup>, K. Béranger<sup>2</sup>, S. Colella<sup>3</sup>, and A. Crise<sup>1</sup>

<sup>1</sup>Istituto Nazionale di Oceanografia e di Geofisica Sperimentale - OGS, Trieste, Italy

<sup>2</sup>École Nationale Supérieure de Techniques Avancées, ENSTA ParisTech, Palaiseau, France

<sup>3</sup>Centro Nazionale delle Ricerche, CNR ISAC UOS, Roma, Italy

\*now at Institute of Marine Sciences, Middle East Technical University, Erdemli, Turkey

Correspondence to: P. Lazzari (plazzari@ogs.trieste.it)

## 1 Introduction

This document presents the list of equations solved by the OPATM-BFM model as referred in Lazzari et al. (this issue). The equation formulation follows the formalism and style proposed by Vichi et al. (2007).

## 2 Phytoplankton

The phytoplankton state variables are connected to 5 basic biogeochemical constituents (C, N, P, Si) and 1 chemical functional family (Chl) and thus for each group we have up to 5 equations:

$$\left. \frac{\partial P_c}{\partial t} \right|_{bio} = \left. \frac{\partial P_c}{\partial t} \right|_{O^{(3)}}^{gpp} - \left. \frac{\partial P_c}{\partial t} \right|_{R_c^{(i)}}^{exu} - \left. \frac{\partial P_c}{\partial t} \right|_{O^{(3)}}^{rsp} - \left. \frac{\partial P_c}{\partial t} \right|_{R_c^{(i)}}^{lys} - \sum_j \left. \frac{\partial P_c}{\partial t} \right|_{Z_c^{(j)}}^{prd} \quad (1)$$

$$\left. \frac{\partial P_n}{\partial t} \right|_{bio} = \left. \frac{\partial P_n}{\partial t} \right|_{N^{(3)}, N^{(4)}}^{upt} - \left. \frac{\partial P_n}{\partial t} \right|_{R_n^{(i)}}^{lys} - \frac{P_n}{P_c} \sum_j \left. \frac{\partial P_c}{\partial t} \right|_{Z_c^{(j)}}^{prd} \quad (2)$$

$$\left. \frac{\partial P_p}{\partial t} \right|_{bio} = \left. \frac{\partial P_p}{\partial t} \right|_{N^{(1)}}^{upt} - \left. \frac{\partial P_p}{\partial t} \right|_{R_p^{(i)}}^{lys} - \frac{P_p}{P_c} \sum_j \left. \frac{\partial P_c}{\partial t} \right|_{Z_c^{(j)}}^{prd} \quad (3)$$

$$\left. \frac{\partial P_s}{\partial t} \right|_{bio} = \left. \frac{\partial P_s}{\partial t} \right|_{N^{(5)}}^{upt} - \left. \frac{\partial P_s}{\partial t} \right|_{R_s^{(6)}}^{lys} - \frac{P_s}{P_c} \sum_j \left. \frac{\partial P_c}{\partial t} \right|_{Z_c^{(j)}}^{prd} \quad (4)$$

$$\text{if } P_s = P_s^{(1)}, \text{ otherwise } \left. \frac{\partial P_s}{\partial t} \right|_{bio} = 0$$

$$\left. \frac{\partial P_l}{\partial t} \right|_{bio} = \left. \frac{\partial P_l}{\partial t} \right|^{syn} - \frac{P_l}{P_c} \sum_j \left. \frac{\partial P_c}{\partial t} \right|_{Z_c^{(j)}}^{prd} \quad (5)$$

## 2.1 Regulating factors

### 2.1.1 Temperature

$$f_P^T = Q_{10}^{\frac{T-10}{10}} \quad (6)$$

### 2.1.2 Nutrients

$$f_P^{n,p} = \min \left( \frac{P_n/P_c - n_p^{\min}}{n_P^{opt} - n_p^{\min}}, \frac{P_p/P_c - p_p^{\min}}{p_P^{opt} - p_p^{\min}} \right) \quad (7)$$

$$\begin{aligned} f_{P(1)}^s &= \frac{P_s/P_c - s_p^{\min}}{s_P^{opt} - s_p^{\min}} \\ f_{P(j)}^s &= 1, \quad j \neq 1 \end{aligned} \quad (8)$$

### 2.1.3 Light

$$E_{PAR} = E_{PAR}^k \exp \left( -\lambda^k \frac{\Delta z^k}{2} \right) \quad (9)$$

$$f_P^E = 1 - \exp \left( -\frac{\alpha_{chl}^0 E_{PAR} P_l}{f_P^T f_P^s r_P^0 P_c} \right). \quad (10)$$

derived from

$$f_P^E = 1 - \exp \left( -\frac{E_{PAR}}{E_K} \right)$$

$$\begin{aligned} E_k &= P_m^* / \alpha^* \\ P_m^* &= f_P^T f_P^s r_P^0 \frac{P_c}{P_l} \\ \alpha^* &= \alpha_{chl}^0 \end{aligned}$$

## 2.2 Photosynthesis

$$\left. \frac{\partial P_c}{\partial t} \right|_{O^{(3)}}^{gpp} = f_P^T f_P^E f_P^S r_P^0 P_c, \quad (11)$$

## 2.3 Exudation

$$\left. \frac{\partial P_c}{\partial t} \right|_{R_c^{(1)}}^{exu} = \beta_P \left. \frac{\partial P_c}{\partial t} \right|_{O^{(3)}}^{gpp} \quad (12)$$

## 2.4 Respiration

$$\left. \frac{\partial P_c}{\partial t} \right|_{O^{(3)}}^{rsp} = b_P f_P^T P_c + \gamma_P \left\{ \left. \frac{\partial P_c}{\partial t} \right|_{O^{(3)}}^{gpp} - \left. \frac{\partial P_c}{\partial t} \right|_{R_c^{(1)}}^{exu} \right\} \quad (13)$$

## 2.5 Lysis

$$\left. \frac{\partial P_c}{\partial t} \right|_{R_c^{(1)}}^{lys} = (1 - \epsilon_P^{n,p}) \frac{h_P^{p,n}}{f_P^{p,n} + h_P^{p,n}} d_P^\circ P_c \quad (14)$$

$$\left. \frac{\partial P_c}{\partial t} \right|_{R_c^{(6)}}^{lys} = \epsilon_P^{n,p} \frac{h_P^{p,n}}{f_P^{p,n} + h_P^{p,n}} d_P^\circ P_c \quad (15)$$

$$\epsilon_P^{n,p} = \min \left( 1, \frac{p_P^{\min}}{P_p/P_c}, \frac{n_P^{\min}}{P_n/P_c} \right)$$

For  $P^{(4)}$  there is an extra lysis rate ( $d_{P^{(4)}}^\circ$ ):

$$\left. \frac{\partial P_c^{(4)}}{\partial t} \right|_{R_c^{(1)}}^{lys} = (1 - \epsilon_P^{n,p}) \frac{h_P^{p,n}}{f_P^{p,n} + h_P^{p,n}} d_P^\circ P_c^{(4)} + d_{P^{(4)}}^\circ \quad (16)$$

$$d_{P^{(4)}c}^\circ = \frac{P_c^{(4)}}{P_c^{(4)} + 100} \quad (17)$$

## 2.6 Nutrient uptake

$$\left. \frac{\partial P_p}{\partial t} \right|_{N^{(1)}}^{upt} = \min \left( a_p^1 N^{(1)} P_c, G_P P_p^{\max} + f_P^T r_P^0 \left( p_p^{\max} - \frac{P_p}{P_c} \right) P_c \right) \quad (18)$$

$$\left. \frac{\partial P_n}{\partial t} \right|_{N^{(3)}, N^{(4)}}^{upt} = \min \left( \left( a_p^3 N^{(3)} + a_p^4 N^{(4)} \right) P_c, G_P n_p^{\max} + f_P^T r_P^0 \left( n_p^{\max} - \frac{P_n}{P_c} \right) P_c \right) \quad (19)$$

$$a_p^3 = a_p \frac{l_{N4}}{l_{N4} + N^{(4)}} \quad (20)$$

$$a_p^4 = a_p \quad (21)$$

If the nitrogen uptake rate (19) is positive, then the partitioning between  $N^{(3)}$  and  $N^{(4)}$  uptake is done using the ratios  $\frac{a_p^3 N^{(3)}}{a_p^3 N^{(3)} + a_p^4 N^{(4)}}$  and  $\frac{a_p^4 N^{(4)}}{a_p^3 N^{(3)} + a_p^4 N^{(4)}}$ , respectively:

$$\left. \frac{\partial P_n}{\partial t} \right|_{N^{(3)}}^{upt} = \frac{a_p^3 N^{(3)}}{a_p^3 N^{(3)} + a_p^4 N^{(4)}} \left. \frac{\partial P_n}{\partial t} \right|_{N^{(3)}, N^{(4)}}^{upt} \quad (22)$$

$$\left. \frac{\partial P_n}{\partial t} \right|_{N^{(4)}}^{upt} = \frac{a_p^4 N^{(4)}}{a_p^3 N^{(3)} + a_p^4 N^{(4)}} \left. \frac{\partial P_n}{\partial t} \right|_{N^{(3)}, N^{(4)}}^{upt} \quad (23)$$

If it is negative, the whole flux is directed to the ammonia pool, phosphates and silicates

$$\left. \frac{\partial P_n}{\partial t} \right|_{N^{(4)}}^{rel} = \left. \frac{\partial P_n}{\partial t} \right|_{N^{(3)}, N^{(4)}}^{upt} \quad (24)$$

$$\left. \frac{\partial P_p}{\partial t} \right|_{N^{(1)}}^{rel} = \left. \frac{\partial P_p}{\partial t} \right|_{N^{(1)}}^{upt} \quad (25)$$

$$\left. \frac{\partial P_s}{\partial t} \right|_{N^{(1)}}^{rel} = \left. \frac{\partial P_s}{\partial t} \right|_{N^{(5)}}^{upt} \quad (26)$$

$$\left. \frac{\partial P_s^{(1)}}{\partial t} \right|_{N^{(5)}}^{upt} = \max \left( 0, s_{P^{(1)}}^{\max} G_{P^{(1)}} \right) - \max \left( 0, \left( \frac{P_s^{(1)}}{P_c^{(1)}} - s_{P^{(1)}}^{opt} \right) P_c^{(1)} \right) \quad (27)$$

$$G_P = \frac{\partial P_c}{\partial t} \Big|_{O^{(3)}}^{gpp} - \frac{\partial P_c}{\partial t} \Big|_{R_c^{(i)}}^{exu} - \frac{\partial P_c}{\partial t} \Big|_{O^{(3)}}^{rsp} - \frac{\partial P_c}{\partial t} \Big|_{R_c^{(i)}}^{lys}$$

## 2.7 Nutrient release

$$\frac{\partial P_p}{\partial t} \Big|_{R_p^{(1)}}^{lys} = (1 - \epsilon_p^{n,p}) \frac{h_p^{p,n}}{f_p^{p,n} + h_p^{p,n}} d_p^\circ P_p \quad (28)$$

$$\frac{\partial P_p}{\partial t} \Big|_{R_p^{(6)}}^{lys} = \epsilon_p^{n,p} \frac{h_p^{p,n}}{f_p^{p,n} + h_p^{p,n}} d_p^\circ P_p \quad (29)$$

$$\frac{\partial P_n}{\partial t} \Big|_{R_n^{(1)}}^{lys} = (1 - \epsilon_p^{n,p}) \frac{h_p^{p,n}}{f_p^{p,n} + h_p^{p,n}} d_p^\circ P_n \quad (30)$$

$$\frac{\partial P_n}{\partial t} \Big|_{R_n^{(6)}}^{lys} = \epsilon_p^{n,p} \frac{h_p^{p,n}}{f_p^{p,n} + h_p^{p,n}} d_p^\circ P_n \quad (31)$$

$$\frac{\partial P_s}{\partial t} \Big|_{R_s^{(6)}}^{lys} = \frac{h_p^{p,n}}{f_p^{p,n} + h_p^{p,n}} d_p^\circ P_s \quad (32)$$

$$\epsilon_p^{n,p} = \min \left( 1, \frac{p_p^{\min}}{P_p/P_c}, \frac{n_p^{\min}}{P_n/P_c} \right)$$

## 2.8 Excretion of sugars, internal balance

$$\frac{\partial P_c}{\partial t} \Big|_{R_c^{(1)}}^{npp} = \frac{\partial P_c}{\partial t} \Big|_{O^{(3)}}^{gpp} - \frac{\partial P_c}{\partial t} \Big|_{R_c^{(1)}}^{exu} - \frac{\partial P_c}{\partial t} \Big|_{R_c^{(1)}}^{rsp} \quad (33)$$

$$\frac{\partial P_c}{\partial t} \Big|_{R_c^{(2)}}^{cor} = \frac{\partial P_c}{\partial t} \Big|_{R_c^{(1)}}^{npp} - \max \left( 0, \min \left( \frac{\partial P_c}{\partial t} \Big|_{R_c^{(1)}}^{npp}, \frac{1}{p_p^{\min}} \frac{\partial P_n}{\partial t} \Big|_{N^{(3)}, N^{(4)}}^{upt}, \frac{1}{n_p^{\min}} \frac{\partial P_p}{\partial t} \Big|_{N^{(1)}}^{upt} \right) \right) \quad (34)$$

## 2.9 Chlorophyll

$$\begin{aligned} \left. \frac{\partial P_l}{\partial t} \right|^{syn} = & f_P^{p,n} \rho_{chl} \left( \left. \frac{\partial P_c}{\partial t} \right|_{O^{(3)}}^{gpp} - \left. \frac{\partial P_c}{\partial t} \right|_{R_c^{(i)}}^{exu} - \left. \frac{\partial P_c}{\partial t} \right|_{O^{(3)}}^{rsp} - \left. \frac{\partial P_c}{\partial t} \right|_{R_c^{(i)}}^{cor} \right) - \max(0, d_P^o (1 - f_P^{p,n})) P_l + \\ & + \min \left( 0, \left. \frac{\partial P_c}{\partial t} \right|_{R_c^{(1)}}^{npp} \right) * \max(0, P_l - \theta_{chl}^0 P_c) \end{aligned} \quad (35)$$

$$\rho_{chl} = \theta_{chl}^0 \frac{\left. \frac{\partial P_c}{\partial t} \right|_{O^{(3)}}^{gpp}}{\alpha^* E_{PAR} P_l} = \theta_{chl}^0 \frac{f_P^T f_P^E f_P^s r_P^0 P_c}{\alpha_{chl}^0 E_{PAR} P_l} \quad (36)$$

## 3 Bacterioplankton

The bacteria state variable is connected to 3 basic biogeochemical constituents, C, N and P, with 3 dynamical equations:

$$\left. \frac{\partial B_c}{\partial t} \right|_{bio} = \left. \frac{\partial B_c}{\partial t} \right|_{R_c^{(i)}}^{upt} - \left. \frac{\partial B_c}{\partial t} \right|_{O^{(3)}}^{rsp} - \sum_j \left. \frac{\partial B_c}{\partial t} \right|_{Z_c^{(j)}}^{prd} \quad (37)$$

$$\left. \frac{\partial B_n}{\partial t} \right|_{bio} = \frac{R_n^{(i)}}{R_c^{(i)}} \left. \frac{\partial B_c}{\partial t} \right|_{R_c^{(i)}}^{bcd} + \left. \frac{\partial B_n}{\partial t} \right|_{N^{(k)}}^{upt,rel} - \frac{B_n}{B_c} \sum_j \left. \frac{\partial B_c}{\partial t} \right|_{Z_c^{(j)}}^{prd} \quad (38)$$

$$\left. \frac{\partial B_p}{\partial t} \right|_{bio} = \frac{R_p^{(i)}}{R_c^{(i)}} \left. \frac{\partial B_c}{\partial t} \right|_{R_p^{(i)}}^{bcd} + \left. \frac{\partial B_p}{\partial t} \right|_{N^{(1)}}^{upt,rel} - \frac{B_p}{B_c} \sum_j \left. \frac{\partial B_c}{\partial t} \right|_{Z_c^{(j)}}^{prd} \quad (39)$$

### 3.1 Carbon uptake

$$\left. \frac{\partial B_c}{\partial t} \right|_{R_c^{(1)}}^{upt} = \left. \frac{\partial B_c}{\partial t} \right|_{R_c^{(1)}, R_c^{(2)}, R_c^{(6)}}^{upt} \frac{v_{R^{(1)}} R_c^{(1)}}{sub\_avail} \quad (40)$$

$$\left. \frac{\partial B_c}{\partial t} \right|_{R_c^{(2)}}^{upt} = \left. \frac{\partial B_c}{\partial t} \right|_{R_c^{(1)}, R_c^{(2)}, R_c^{(6)}}^{upt} \frac{v_{R^{(2)}} R_c^{(2)}}{sub\_avail} \quad (41)$$

$$\left. \frac{\partial B_c}{\partial t} \right|_{R_c^{(6)}}^{upt} = \left. \frac{\partial B_c}{\partial t} \right|_{R_c^{(1)}, R_c^{(2)}, R_c^{(6)}}^{upt} \frac{v_{R^{(6)}} f_{R^{(6)}}^{n,p} R_c^{(6)}}{sub\_avail} \quad (42)$$

where

$$\left. \frac{\partial B_c}{\partial t} \right|_{R_c^{(1)}, R_c^{(2)}, R_c^{(6)}}^{upt} = \min \left( f_B^{n,p} Q_{10B}^{\frac{T-10}{10}} r_{0B} B_c, sub\_avail \right) \quad (43)$$

and  $sub\_avail$  is the sub-strate availability:

$$sub\_avail = v_{R^{(1)}} R_c^{(1)} + v_{R^{(2)}} R_c^{(2)} + v_{R^{(6)}} f_{R^{(6)}}^{n,p} R_c^{(6)} \quad (44)$$

$$f_B^{n,p} = \min \left( 1, \frac{B_p/B_c}{p^{opt}}, \frac{B_n/B_c}{n^{opt}} \right); \quad f_{R^{(6)}}^{n,p} = \min \left( 1, \frac{R_p^{(6)}/R_c^{(6)}}{p^{opt}}, \frac{R_n^{(6)}/R_c^{(6)}}{n^{opt}} \right) \quad (45)$$

### 3.2 Respiration

$$\left. \frac{\partial B_c}{\partial t} \right|_{O^{(3)}}^{rsp} = b_B f_B^T B_c + [1 - \eta_B + \eta_B^o (1 - f_B^o)] \left. \frac{\partial B_c}{\partial t} \right|_{R_c^{(1)}, R_c^{(6)}}^{upt} \quad (46)$$

$$f_B^o = \frac{(O^{(2)})^3}{(O^{(2)})^3 + (h_B^o)^3} \quad (47)$$

### 3.3 Mortality

$$\left. \frac{\partial B_c}{\partial t} \right|_{R_i^{(1)}}^{rel} = d_B^0 f_B^T B_c \quad i = c, n, p \quad (48)$$

### 3.4 Nutrient uptake and release

Uptake from substrate (organic component)

$$\left. \frac{\partial B_p}{\partial t} \right|_{R_p^{(1)}}^{upt} = \frac{R_p^{(1)}}{R_c^{(1)}} \left. \frac{\partial B_c}{\partial t} \right|_{R_c^{(1)}}^{upt} \quad \left. \frac{\partial B_p}{\partial t} \right|_{R_p^{(6)}}^{upt} = \frac{R_p^{(6)}}{R_c^{(6)}} \left. \frac{\partial B_c}{\partial t} \right|_{R_c^{(6)}}^{upt} \quad (49)$$

$$\left. \frac{\partial B_n}{\partial t} \right|_{R_n^{(1)}}^{upt} = \frac{R_n^{(1)}}{R_c^{(1)}} \left. \frac{\partial B_c}{\partial t} \right|_{R_c^{(1)}}^{upt} \quad \left. \frac{\partial B_n}{\partial t} \right|_{R_n^{(6)}}^{upt} = \frac{R_n^{(6)}}{R_c^{(6)}} \left. \frac{\partial B_c}{\partial t} \right|_{R_c^{(6)}}^{upt} \quad (50)$$

for the uptake/release from inorganic substrate the difference between uptake rate of substrate organic P and rate of uptake of substrate C multiplied by the optimal ratio  $p_B^{opt}$  is considered, if we have phosphorus uptake higher than optimal phosphorus uptake based on carbon uptake:

$$\left. \frac{\partial B_p}{\partial t} \right|_{R_p^{(1)}}^{upt} + \left. \frac{\partial B_p}{\partial t} \right|_{R_p^{(6)}}^{upt} - p_B^{opt} \left( \left. \frac{\partial B_c}{\partial t} \right|_{R_c^{(1)}, R_c^{(2)}, R_c^{(6)}}^{upt} - \left. \frac{\partial B_c}{\partial t} \right|_{O^{(3)}}^{rsp} \right) > 0 \quad (51)$$

there is a release of inorganic phosphorus equivalent to the surplus uptake:

$$\left. \frac{\partial B_p}{\partial t} \right|_{N^{(1)}}^{upt,rel} = - \left( \left. \frac{\partial B_p}{\partial t} \right|_{R_p^{(1)}}^{upt} + \left. \frac{\partial B_p}{\partial t} \right|_{R_p^{(6)}}^{upt} - p_B^{opt} \left( \left. \frac{\partial B_c}{\partial t} \right|_{R_c^{(1)}, R_c^{(2)}, R_c^{(6)}}^{upt} - \left. \frac{\partial B_c}{\partial t} \right|_{O^{(3)}}^{rsp} \right) \right) \quad (52)$$

if eq.(51) is lower than zero, bacteria uptake from phosphate

$$\left. \frac{\partial B_p}{\partial t} \right|_{N^{(1)}}^{upt,rel} = \min \left( a_P^{1N^{(1)}} B_c, p_B^{opt} \left( \left. \frac{\partial B_c}{\partial t} \right|_{R_c^{(1)}, R_c^{(2)}, R_c^{(6)}}^{upt} - \left. \frac{\partial B_c}{\partial t} \right|_{O^{(3)}}^{rsp} \right) - \left( \left. \frac{\partial B_p}{\partial t} \right|_{R_p^{(1)}}^{upt} + \left. \frac{\partial B_p}{\partial t} \right|_{R_p^{(6)}}^{upt} \right) \right) \quad (53)$$

Nitrogen fluxes in bacteria has a similar structure to phosphorus: for the uptake/release from inorganic substrate the difference between uptake rate of substrate organic N and rate of uptake of substrate C multiplied by the optimal ratio  $n_B^{opt}$  is considered, if we have nitrogen uptake

higher than optimal nitrogen uptake based on carbon uptake:

$$\frac{\partial B_n}{\partial t} \Big|_{R_n^{(1)}}^{upt} + \frac{\partial B_n}{\partial t} \Big|_{R_n^{(6)}}^{upt} - n_B^{opt} \left( \frac{\partial B_c}{\partial t} \Big|_{R_c^{(1)}, R_c^{(2)}, R_c^{(6)}}^{upt} - \frac{\partial B_c}{\partial t} \Big|_{O^{(3)}}^{rsp} \right) > 0 \quad (54)$$

there is a release of ammonia equivalent to the surplus uptake:

$$\frac{\partial B_p}{\partial t} \Big|_{N^{(4)}}^{upt,rel} = - \left( \frac{\partial B_n}{\partial t} \Big|_{R_n^{(1)}}^{upt} + \frac{\partial B_n}{\partial t} \Big|_{R_n^{(6)}}^{upt} - n_B^{opt} \left( \frac{\partial B_c}{\partial t} \Big|_{R_c^{(1)}, R_c^{(2)}, R_c^{(6)}}^{upt} - \frac{\partial B_c}{\partial t} \Big|_{O^{(3)}}^{rsp} \right) \right) \quad (55)$$

if eq.(59) is lower than zero, bacteria uptake is done from nitrates and ammonia:

$$\begin{aligned} \frac{\partial B_p}{\partial t} \Big|_{N^{(3)}}^{upt} &= \min \left( \left( a_B^3 N^{(3)} + a_B^4 N^{(4)} \right) B_c, p_B^{opt} \left( \frac{\partial B_c}{\partial t} \Big|_{R_c^{(1)}, R_c^{(2)}, R_c^{(6)}}^{upt} - \frac{\partial B_c}{\partial t} \Big|_{O^{(3)}}^{rsp} \right) - \left( \frac{\partial B_p}{\partial t} \Big|_{R_p^{(1)}}^{upt} + \frac{\partial B_p}{\partial t} \Big|_{R_p^{(6)}}^{upt} \right) \right) \frac{a_B^3 N^{(3)}}{a_B^3 N^{(3)} + a_B^4 N^{(4)}} \\ \frac{\partial B_p}{\partial t} \Big|_{N^{(4)}}^{upt,rel} &= \min \left( \left( a_B^3 N^{(3)} + a_B^4 N^{(4)} \right) B_c, p_B^{opt} \left( \frac{\partial B_c}{\partial t} \Big|_{R_c^{(1)}, R_c^{(2)}, R_c^{(6)}}^{upt} - \frac{\partial B_c}{\partial t} \Big|_{O^{(3)}}^{rsp} \right) - \left( \frac{\partial B_p}{\partial t} \Big|_{R_p^{(1)}}^{upt} + \frac{\partial B_p}{\partial t} \Big|_{R_p^{(6)}}^{upt} \right) \right) \frac{a_B^4 N^{(4)}}{a_B^3 N^{(3)} + a_B^4 N^{(4)}} \end{aligned} \quad (56)$$

$$a_B^3 = a_B \frac{l_{N4}}{l_{N4} + N^{(4)}} \quad (57)$$

$$a_B^4 = a_B \quad (58)$$

### 3.5 Carbon correction

$$\frac{\partial B_c}{\partial t} \Big|_{R_c^{(7)}}^{cor} = \frac{\partial B_c}{\partial t} \Big|_{R_c^{(1)}, R_c^{(2)}, R_c^{(6)}}^{upt} - \frac{\partial B_c}{\partial t} \Big|_{O^{(3)}}^{rsp} - \min \left( \frac{\partial B_c}{\partial t} \Big|_{R_c^{(1)}, R_c^{(2)}, R_c^{(6)}}^{upt} - \frac{\partial B_c}{\partial t} \Big|_{O^{(3)}}^{rsp}, \frac{\frac{\partial B_n}{\partial t} \Big|_{R_n^{(1)}}^{upt} + \frac{\partial B_n}{\partial t} \Big|_{R_n^{(6)}}^{upt} + \frac{\partial B_n}{\partial t} \Big|_{N^{(3)}, N^{(4)}}^{upt,rel}}{n_B^{min}}, \frac{\frac{\partial B_p}{\partial t} \Big|_{R_p^{(1)}}^{upt} + \frac{\partial B_p}{\partial t} \Big|_{R_p^{(6)}}^{upt} + \frac{\partial B_p}{\partial t} \Big|_{N^{(1)}}^{upt,rel}}{p_B^{min}} \right) \quad (59)$$

## 4 Zooplankton

$$\left. \frac{\partial Z_c}{\partial t} \right|_{bio} = \sum_{X=P,Z} \left. \frac{\partial Z_c}{\partial t} \right|_{X_c}^{prd} - \sum_{j=1,6} \left. \frac{\partial Z_c}{\partial t} \right|_{R_c^{(j)}}^{rel} - \left. \frac{\partial Z_c}{\partial t} \right|_{O^{(3)}}^{rsp} - \sum_{k=4,5,6} \left. \frac{\partial Z_c}{\partial t} \right|_{Z_c^{(k)}}^{prd} \quad (60)$$

$$\left. \frac{\partial Z_n}{\partial t} \right|_{bio} = \frac{F_n}{F_c} \sum_{X=P,Z} \left. \frac{\partial Z_c}{\partial t} \right|_{X_c}^{prd} - \sum_{j=1,6} \left. \frac{\partial Z_n}{\partial t} \right|_{R_n^{(j)}}^{rel} - \left. \frac{\partial Z_n}{\partial t} \right|_{N^{(4)}}^{rel} - \frac{Z_n}{Z_c} \sum_{k=4,5,6} \left. \frac{\partial Z_c}{\partial t} \right|_{Z_c^{(k)}}^{prd} \quad (61)$$

$$\left. \frac{\partial Z_p}{\partial t} \right|_{bio} = \frac{F_p}{F_c} \sum_{X=P,Z} \left. \frac{\partial Z_c}{\partial t} \right|_{X_c}^{prd} - \sum_{j=1,6} \left. \frac{\partial Z_p}{\partial t} \right|_{R_p^{(j)}}^{rel} - \left. \frac{\partial Z_p}{\partial t} \right|_{N^{(1)}}^{rel} - \frac{Z_p}{Z_c} \sum_{k=4,5,6} \left. \frac{\partial Z_c}{\partial t} \right|_{Z_c^{(k)}}^{prd} \quad (62)$$

### 4.1 Food availability

$$F_i = \sum_X \delta_{Z,X} e_{Z,X} X_i; \quad X_i \in \{P_i^{(j)}, B_i, Z_i^{(j)}\}$$

where  $\delta_{Z,X}$  is the availability of predator Z for prey  $X_i$  and  $e_{Z,X}$  is the capture efficiency.  $e_{Z,X} = \frac{X_c}{X_c + \mu_Z}$ ,  $\mu_Z$  ( $\mu_Z = 0$  for mesozooplankton).

### 4.2 Ingestion

$$\left. \frac{\partial Z_c}{\partial t} \right|_{X_c}^{prd} = - \left. \frac{\partial X_c}{\partial t} \right|_{Z_c}^{prd} = f_Z^T r_Z^0 \frac{\delta_{Z,X} e_{Z,X} X_c}{F_c} \frac{F_c}{F_c + h_Z^F} Z_c \quad (63)$$

which is rewritten in terms of the specific search volume in the case of mesozooplankton ( $h_Z^F = \frac{r_Z^0}{v_Z}$ ), because this parameter is generally available in the literature. Total ingestion rate:

$$\mathfrak{I}_i = \sum_X \left. \frac{\partial Z_i}{\partial t} \right|_{X_i}^{prd} \quad j = c, n, p. \quad (64)$$

### 4.3 Excretion/egestion

Microzooplankton formulations:

$$\left. \frac{\partial Z_c}{\partial t} \right|_{R_c^{(1)}}^{rel} = \epsilon_Z^c (\beta_Z (1 - \eta_Z) \mathfrak{I}_c + (d_{0Z} f_Z^T + f_Z^o) Z_c) \quad (65)$$

$$\left. \frac{\partial Z_c}{\partial t} \right|_{R_c^{(6)}}^{rel} = (1 - \varepsilon_z^c) (\beta_z (1 - \eta_z) \mathfrak{S}_c + (d_{0z} f_z^T + f_z^o) Z_c) \quad (66)$$

$$f_z^o = \min \left( 1, \left( 1 - h_z^o \right) \frac{\frac{O}{O^{sat}}}{\frac{O}{O^{sat}} + h_z^o} \right) \quad (67)$$

for mesozooplankton:

$$\left. \frac{\partial Z_c}{\partial t} \right|_{R_c^{(6)}}^{rel} = \left( \beta_z \mathfrak{S}_c + d_{0z} f_z^T Z_c + d_z^{dns} Z_c^{\gamma_z} + Q_z^c \right) \quad (68)$$

The balancing flow of C  $Q_z^c$  for the mesozooplankton is computed from the actual elemental ratios of ingested material:

$$\Gamma_z^i = \frac{(1 - \beta_z) \mathfrak{S}_i}{\eta_z \mathfrak{S}_c}, \quad i = n, p \quad (69)$$

the most limiting element is elected considering the lowest between :

$$\frac{\Gamma_z^n}{\frac{Z_n}{Z_c}} \text{ and } \frac{\Gamma_z^p}{\frac{Z_p}{Z_c}} \quad (70)$$

If nitrogen is most limiting and  $\left( \Gamma_z^n < \frac{Z_n}{Z_c} \right)$  then

$$Q_z^c = \eta_z \mathfrak{S}_c - \frac{(1 - \beta_z)}{n_z^{opt}} \mathfrak{S}_n \quad (71)$$

or if phosphorus is most limiting and  $\left( \Gamma_z^p < \frac{Z_p}{Z_c} \right)$ , then

$$Q_z^c = \eta_z \mathfrak{S}_c - \frac{(1 - \beta_z)}{p_z^{opt}} \mathfrak{S}_p, \quad (72)$$

otherways  $Q_z^c = 0$ .

## 4.4 Respiration

for microzooplankton

$$\left. \frac{\partial Z_c}{\partial t} \right|_{O^{(3)}}^{rsp} = (1 - \beta_z)(1 - \eta_z) \mathfrak{S}_c + b_z f_z^T Z_c \quad (73)$$

mesozooplankton:

$$\left. \frac{\partial Z_c}{\partial t} \right|_{O^{(3)}}^{rsp} = (1 - \beta_z - \eta_z) \mathfrak{S}_c + b_z f_z^T Z_c \quad (74)$$

## 4.5 Organic nutrient excretion/egestion

for microzooplankton

$$\left. \frac{\partial Z_i}{\partial t} \right|_{R_i^{(1)}}^{rel} = \frac{Z_i}{Z_c} \min \left( \left. \frac{\partial Z_c}{\partial t} \right|_{R_c^{(1)}}^{rel} + \left. \frac{\partial Z_c}{\partial t} \right|_{R_c^{(6)}}^{rel}, \left. \frac{\partial Z_c}{\partial t} \right|_{R_c^{(1)}}^{rel} * 1.2 \right) \quad (75)$$

$$\left. \frac{\partial Z_i}{\partial t} \right|_{R_i^{(6)}}^{rel} = \frac{Z_i}{Z_c} \left. \frac{\partial Z_c}{\partial t} \right|_{R_c^{(1)}}^{rel} - \left. \frac{\partial Z_i}{\partial t} \right|_{R_i^{(1)}}^{rel} \quad (76)$$

mesozooplankton excretes only in the particulate compartment:

$$\left. \frac{\partial Z_i}{\partial t} \right|_{R_i^{(6)}}^{rel} = \left( \beta_z \mathfrak{S}_i + d_{0z} f_z^T Z_i + d_z^{dns} Z_i^{\gamma_z} \right) \quad (77)$$

## 4.6 Inorganic nutrient release

for microzooplankton:

$$\left. \frac{\partial Z_p}{\partial t} \right|_{N^{(1)}}^{rel} = v_z^p \max \left( 0, \frac{Z_p}{Z_c} - p_z^{opt} \right) Z_p \quad (78)$$

$$\left. \frac{\partial Z_n}{\partial t} \right|_{N^{(4)}}^{rel} = v_z^n \max \left( 0, \frac{Z_n}{Z_c} - n_z^{opt} \right) Z_n \quad (79)$$

for mesozooplankton

$$\left. \frac{\partial Z_p}{\partial t} \right|_{N(1)}^{rel} = (d_{0z} f_z^T Z_p + Q_Z^p) \quad (80)$$

The balancing flow of P  $Q_Z^p$  is computed from the actual elemental ratios of ingested material:

If we are in the condtion 1, limitation by carbon then

$$Q_Z^p = (1 - \beta_z) \mathfrak{I}_p - p_z^{opt} \eta_z \mathfrak{I}_c, \quad (81)$$

in case 2, limitation by phosphorus,  $Q_Z^p = 0$ , and in case 3, limitation by nitrogen

$$Q_Z^p = (1 - \beta_z) \mathfrak{I}_p - p_z^{opt} \eta_z (\mathfrak{I}_c - Q_Z^c), \quad (82)$$

in the latter the correction on carbon grazing (net nitrogen limitation  $Q_Z^c$  case 3) is used as reference to calculate the balance for phosphorus internal quota.

Same arguments are valid for nitrogen internal quota:

$$\left. \frac{\partial Z_n}{\partial t} \right|_{N(4)}^{rel} = (d_{0z} f_z^T Z_n + Q_Z^n) \quad (83)$$

The balancing flow of P  $Q_Z^n$  is computed from the actual elemental ratios of ingested material:

If we are in the condtion 1, limitation by carbon then

$$Q_Z^n = (1 - \beta_z) \mathfrak{I}_n - n_z^{opt} \eta_z \mathfrak{I}_c \quad (84)$$

in case 2, limitation by phosphorus:

$$Q_Z^n = (1 - \beta_z) \mathfrak{I}_n - n_z^{opt} \eta_z (\mathfrak{I}_c - Q_Z^c) \quad (85)$$

in the latter the correction on carbon grazing (net on phosphorus limitation  $Q_Z^c$  case 2 ) is

used as reference to calculate the balance for nitrogen internal quota.

in the case 3, nitrogen limitation,  $Q_Z^p = 0$

| <i>Symbol</i>                     | $P^{(1)}$                           | $P^{(2)}$                           | $P^{(3)}$                           | $P^{(4)}$                           | Description                                                                          |
|-----------------------------------|-------------------------------------|-------------------------------------|-------------------------------------|-------------------------------------|--------------------------------------------------------------------------------------|
| $r_{0P}$                          | 2.50                                | 3.00                                | 3.50                                | 1.50                                | Maximum specific photosynthetic rate ( $d^{-1}$ )                                    |
| $Q_{10P}$                         | 2.00                                | 2.00                                | 2.00                                | 2.00                                | Characteristic Q10 coefficient                                                       |
| $h_{P^{(1)}}^s$                   | 1.00                                | -                                   | -                                   | -                                   | Half saturation value for Si-limitation ( $mmolSi\ m^{-3}$ )                         |
| $b_P$                             | 0.10                                | 0.05                                | 0.10                                | 0.10                                | Basal specific respiration rate ( $d^{-1}$ )                                         |
| $\gamma_P$                        | 0.10                                | 0.10                                | 0.20                                | 0.10                                | Activity respiration fraction (-)                                                    |
| $\beta_P$                         | 0.05                                | 0.20                                | 0.20                                | 0.20                                | Excreted fraction of primary production (-)                                          |
| $h_P^{p,n,s}$                     | 0.00                                | 0.00                                | 0.00                                | 0.00                                | Nutrient stress threshold (-)                                                        |
| $d_{0P}$                          | 0.00                                | 0.00                                | 0.00                                | 0.00                                | Maximum specific lysis rate ( $d^{-1}$ )                                             |
| $a_1$                             | $2.50\ 10^{-3}$                     | $2.50\ 10^{-3}$                     | $2.50\ 10^{-3}$                     | $2.50\ 10^{-3}$                     | Specific affinity constant for P ( $m^{-3}\ mg\ C^{-1}\ d^{-1}$ )                    |
| $a_3$                             | $2.50\ 10^{-2}$                     | $2.50\ 10^{-2}$                     | $2.50\ 10^{-2}$                     | $2.50\ 10^{-2}$                     | Specific affinity constant for N- $NO_3$ ( $m^{-3}\ mg\ C^{-1}\ d^{-1}$ )            |
| $l_{N4}$                          | 1.00                                | 0.50                                | 0.10                                | 1.00                                | Nitrate uptake limitation                                                            |
| $s_{P^{(1)}}^{opt}$               | 0.01                                | -                                   | -                                   | -                                   | Standard Si:C ratio in diatoms                                                       |
| $\omega_{P^{(1)}}^{sink}$         | 5.00                                | -                                   | -                                   | 2.50                                | ( $mmolSi\ mg\ C^{-1}$ )<br>Maximum sedimentation rate ( $m\ d^{-1}$ )               |
| $l_{P^{(1)}}^{sink}$              | 0.70                                | 0.75                                | 0.75                                | 0.75                                | Nutrient stress threshold for sedimentation (-)                                      |
| $n_P^{min}, n_P^{opt}, n_P^{max}$ | $1.26\ 10^{-2} \times (0.55, 1, 2)$ | Minimum, optimal and maximum nitrogen quota ( $mmolN\ mgC^{-1}$ )                    |
| $p_P^{min}, p_P^{opt}, p_P^{max}$ | $7.86\ 10^{-4} \times (0.55, 1, 2)$ | Minimum, optimal and maximum phosphorus quota ( $mmolP\ mgC^{-1}$ )                  |
| $s_P^{min}, s_P^{opt}, s_P^{max}$ | $10^{-2} \times (0.7, 1, 1.5)$      | -                                   | -                                   | -                                   | Minimum, optimal and maximum Si quota ( $mmolP\ mgC^{-1}$ )                          |
| $\alpha_{chl}^0$                  | $1.38\ 10^{-5}$                     | $0.46\ 10^{-5}$                     | $1.52\ 10^{-5}$                     | $6.8\ 10^{-6}$                      | Maximum light utilization coefficient ( $mg\ chl\ (mg\ chl)^{-1}\ \mu E^{-1}\ m^2$ ) |
| $\theta_{chl}^0$                  | 0.02                                | 0.02                                | 0.02                                | 0.02                                | Maximum chl:C quotient ( $mg\ chl\ mg\ C^{-1}$ )                                     |
| $d_{P_l}^0$                       | 0.2                                 | 0.2                                 | 0.2                                 | 0.2                                 | Chl-specific turnover rate ( $d^{-1}$ )                                              |

Table 1: Symbols, standard values and description of the phytoplankton parameters.  $P^{(1)}$  = diatoms;  $P^{(2)}$  = nanoflagellates;  $P^{(3)}$  = picophytoplankton;  $P^{(4)}$  = dinoflagellates

## References

- [1] Vichi, M., Pinardi, N., and Masina, S.: A generalized model of pelagic biogeochemistry for the global ocean ecosystem, Part I: Theory, *J. Marine Syst.*, 64, 89–109, 2007.

| <i>Symbol</i>          | $Z^{(3)}$              | $Z^{(4)}$              | $Z^{(5)}$       | $Z^{(6)}$       | Description                                                                                   |
|------------------------|------------------------|------------------------|-----------------|-----------------|-----------------------------------------------------------------------------------------------|
| $Q_{10Z}$              | 2.00                   | 2.00                   | 2.00            | 2.00            | Q10 coefficient (-)                                                                           |
| $h_Z^F$                | $r_{0Z} \setminus v_Z$ | $r_{0Z} \setminus v_Z$ | 30.0            | 100             | Michaelis constant for total food ingestion (mg C m <sup>-3</sup> )                           |
| $\mu_Z$                | 0.00                   | 0.00                   | 50.0            | 50.0            | Feeding threshold (mg C m <sup>-3</sup> )                                                     |
| $r_{0Z}$               | 2.00                   | 2.00                   | 2.00            | 5.0             | Potential specific growth rate (d <sup>-1</sup> )                                             |
| $v_Z$                  | 0.008                  | 0.02                   | -               | -               | Specific search volume (m <sup>3</sup> mg C <sup>-1</sup> )                                   |
| $b_Z$                  | 0.01                   | 0.02                   | 0.02            | 0.02            | Basal specific respiration rate (d <sup>-1</sup> )                                            |
| $\eta_Z$               | 0.60                   | 0.60                   | 0.50            | 0.30            | Assimilation efficiency (-)                                                                   |
| $\beta_Z$              | 0.3                    | 0.35                   | 0.50            | 0.50            | Excreted fraction of uptake (-)                                                               |
| $\varepsilon_Z^c$      | 0.00                   | 0.00                   | 0.70            | 0.70            | Partition between dissolved and particulate excretion of C (-)                                |
| $\varepsilon_Z^n$      | 0.00                   | 0.00                   | check           | check           | Partition between dissolved and particulate excretion of N (-)                                |
| $\varepsilon_Z^p$      | 0.00                   | 0.00                   | check           | check           | Partition between dissolved and particulate excretion of P (-)                                |
| $n_Z^{opt}, p_Z^{opt}$ | 0.015, 0.00167         | 0.015, 0.00167         | 0.0167, 0.00185 | 0.0167, 0.00185 | Maximum nutrient quota (mmolN mgC <sup>-1</sup> , mmolP mgC <sup>-1</sup> )                   |
| $v_Z$                  | -                      | -                      | 0.5             | 0.5             | Specific rate of nutrients and carbon excretion (d <sup>-1</sup> )                            |
| $d_{0Z}$               | 0.01                   | 0.01                   | 0.00            | 0.00            | Specific mortality rate (d <sup>-1</sup> )                                                    |
| $d_Z^{dens}$           | 0.0004                 | 0.0004                 | -               | -               | Density-dependent specific mortality rate (m <sup>3</sup> mgC <sup>-1</sup> d <sup>-1</sup> ) |
| $\gamma_Z$             | 2.00                   | 2.00                   | -               | -               | Exponent for density dependent mortality (-)                                                  |

Table 2: Symbols, standard values and description of the zooplankton parameters.  $Z^{(3)}$ = mesozooplankton carnivorous ;  $Z^{(4)}$ = mesozooplankton omnivorous ;  $Z^{(5)}$ =microzooplankton;  $Z^{(6)}$ =heterotrophic nanoflagellates.

| <i>Symbol</i>          | <i>Value</i>    | <b>Description</b>                                                                |
|------------------------|-----------------|-----------------------------------------------------------------------------------|
| $Q_{10B}$              | 2.95            | Characteristic Q10 coefficient                                                    |
| $h_B^o$                | 30.0            | Half saturation value for oxygen limitation (mmolO <sub>2</sub> m <sup>-3</sup> ) |
| $r_{0B}$               | 8.38            | Potential specific growth rate (d <sup>-1</sup> )                                 |
| $b_B$                  | 0.01            | Basal specific respiration rate (d <sup>-1</sup> )                                |
| $\eta_B$               | 0.40            | Assimilation efficiency (-)                                                       |
| $\eta_B^o$             | 0.20            | Decrease in assimilation efficiency under anoxic conditions(-)                    |
| $d_{0B}$               | 0.00            | Specific mortality rate (d <sup>-1</sup> )                                        |
| $v_R^1$                | 0.5             | Specific potential $R^{(1)}$ uptake (d <sup>-1</sup> )                            |
| $v_R^2$                | 0.25            | Specific potential $R^{(2)}$ uptake (d <sup>-1</sup> )                            |
| $v_R^6$                | 0.1             | Specific potential $R^{(6)}$ uptake (d <sup>-1</sup> )                            |
| $n_B^{opt}, p_B^{opt}$ | 0.017, 0.0019   | Optimal nutrient quota (mmolN mgC <sup>-1</sup> , mmolP mgC <sup>-1</sup> )       |
| $n_B^{min}, p_B^{min}$ | 0.0085, 0.00095 | Minimum nutrient quota (mmolN mgC <sup>-1</sup> , mmolP mgC <sup>-1</sup> )       |

Table 3: Symbols, standard values and description of the bacterioplankton parameters.
